# Supplementary material for: A high-throughput newborn screening approach for SCID, SMA, and SCD combining multiplex qPCR and tandem mass spectrometry
Source: PubMed Central journal article supplement (PMC10004496; doi:10.1371/journal.pone.0283024), 2023-03-10
Supplement: pone.0283024.s003.pdf [file pone.0283024.s003.pdf]

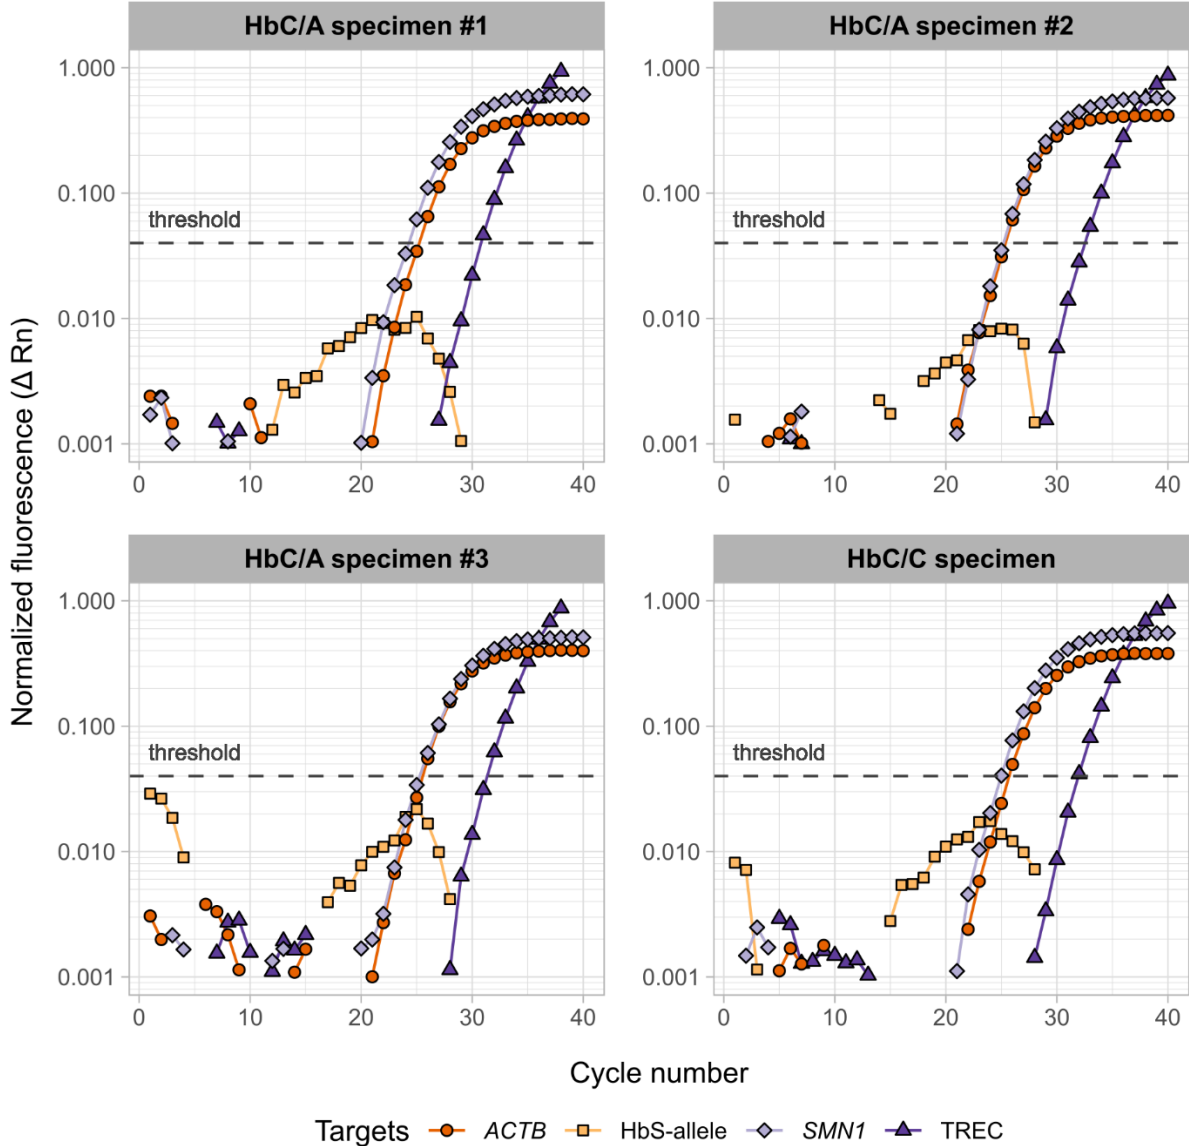

S3 Figure. Amplification plots for four exemplary HbC-containing specimens devoid of HbS (three HbC/A and one HbC/C). The signal for the HbS allele is not amplified in any of the samples. The corresponding MS/MS results are shown in S4 Table.
