# Supplementary material for: A high-throughput newborn screening approach for SCID, SMA, and SCD combining multiplex qPCR and tandem mass spectrometry
Source: PubMed Central journal article supplement (PMC10004496; doi:10.1371/journal.pone.0283024), 2023-03-10
Supplement: pone.0283024.s004.pdf [file pone.0283024.s004.pdf]

**S1 Table. Quality controls (QCs) composition used in the qPCR assay.** Bovine RBC was 1:2 diluted with TE buffer pH 8.0 and different synthetic dsDNA (gBlocks, IDT) were used to spike the different QCs. RBC: red blood cells.

| <b>Quality Control</b> | <b>Purpose</b>                                 | <b>Content</b>                                                                                                                                                                                                   |
|------------------------|------------------------------------------------|------------------------------------------------------------------------------------------------------------------------------------------------------------------------------------------------------------------|
| <b>QC1</b>             | Negative control:<br>No synthetic dsDNA added  | <ul style="list-style-type: none"> <li>• Bovine RBC</li> <li>• 1x TE Buffer pH 8.0</li> </ul>                                                                                                                    |
| <b>QC2</b>             | Positive control:<br>Screening negative sample | <ul style="list-style-type: none"> <li>• Bovine RBC</li> <li>• 1x TE Buffer pH 8.0</li> <li>• <i>ACTB</i></li> <li>• <i>SMN1</i> (Exon-7)</li> <li>• <i>HBB</i> (CD-6)</li> <li>• sj-TREC</li> </ul>             |
| <b>QC3</b>             | Positive control:<br>Screening positive sample | <ul style="list-style-type: none"> <li>• Bovine RBC</li> <li>• 1x TE Buffer pH 8.0</li> <li>• <i>ACTB</i></li> <li>• <i>SMN2</i> (Exon-7, c.840C&gt;T)</li> <li>• HbS allele (<i>HBB</i>: c.20A&gt;T)</li> </ul> |
