# Supplementary material for: A high-throughput newborn screening approach for SCID, SMA, and SCD combining multiplex qPCR and tandem mass spectrometry
Source: PubMed Central journal article supplement (PMC10004496; doi:10.1371/journal.pone.0283024), 2023-03-10
Supplement: pone.0283024.s005.pdf [file pone.0283024.s005.pdf]

S2 Table. Targeted hemoglobin peptides, assigned mass transitions, and optimized mass spectrometric parameters used in the 2<sup>nd</sup> tier instrumental analysis.

| Target                    | Peptides and fragments | Parent m/z /Da | Daughter m/z /Da | Collision energy / V |
|---------------------------|------------------------|----------------|------------------|----------------------|
| <b>HbS</b>                | bT1 y4                 | 461.8          | 472.3            | 21                   |
|                           | bT1 y7                 | 461.8          | 412.3            | 18                   |
| <b>HbC</b>                | bT1 b3                 | 347.7          | 350.3            | 18                   |
|                           | bT1 y5                 | 347.7          | 298.2            | 15                   |
| <b>HbD<sup>punj</sup></b> | bT13 b2                | 689.4          | 276.1            | 18                   |
|                           | bT13 b3                | 689.4          | 377.2            | 21                   |
| <b>HbO<sup>arab</sup></b> | bT13 y9                | 625.4          | 1001.6           | 18                   |
|                           | bT13 y9                | 625.4          | 501.3            | 18                   |
| <b>HbE</b>                | bT3 y6                 | 458.8          | 604.3            | 18                   |
|                           | bT3 y7                 | 458.8          | 703.4            | 18                   |
| <b>HbF</b>                | gT5 y4                 | 995.47         | 415.2            | 24                   |
|                           | gT2 y6                 | 488.8          | 691.4            | 18                   |
|                           | gT2 y7                 | 488.8          | 804.5            | 18                   |
| <b>HbLep</b>              | dT2 y6                 | 480.3          | 688.4            | 18                   |
|                           | dT2 y3                 | 480.3          | 390.2            | 21                   |
| <b>HbA2</b>               | dT14 y9                | 721.34         | 532.8            | 18                   |
| <b>HbA</b>                | bT1 y4                 | 476.85         | 502.2            | 24                   |
|                           | bT1 y7                 | 476.85         | 427.3            | 18                   |
|                           | bT13 b2                | 689.9          | 277.1            | 21                   |
|                           | bT13 b3                | 689.9          | 378.2            | 18                   |
|                           | bT13 y9                | 689.9          | 1001.5           | 21                   |
|                           | bT3 y9                 | 657.9          | 887.5            | 21                   |
|                           | bT3 y8                 | 657.9          | 758.2            | 21                   |
|                           | bT2 y6                 | 466.76         | 675.4            | 18                   |
| <b>IS digested</b>        |                        | 465.8          | 480.3            | 21                   |
| <b>IS intact</b>          |                        | 509.6          | 350.4            | 18                   |
