# Supplementary material for: A high-throughput newborn screening approach for SCID, SMA, and SCD combining multiplex qPCR and tandem mass spectrometry
Source: PubMed Central journal article supplement (PMC10004496; doi:10.1371/journal.pone.0283024), 2023-03-10
Supplement: pone.0283024.s006.pdf [file pone.0283024.s006.pdf]

**S3 Table. Diagnostic ratios used in the 2<sup>nd</sup> tier MS/MS method, the mass transitions for their calculation, and the action values applied.**

| <b>Ratio</b>               | <b>Used mass transitions to calculate</b>      | <b>Cutoff</b> |
|----------------------------|------------------------------------------------|---------------|
| IS-Ratio                   | IS digested / IS intact                        |               |
| HbS/HbA_1                  | HbS_bT1_y4_1 / HbA_bT1_y4_1                    | 2,67          |
| HbS/HbA_2                  | HbS_bT1_y7_2 / HbA_bT1_y7_2                    | 3,17          |
| HbC/HbA_1                  | HbC_bT1_b3_1 / HbA_bT1_y4_1                    | 1,0           |
| HbC/HbA_2                  | HbC_bT1_y5_2 / HbA_bT1_y7_2                    | 1,0           |
| HbE/HbA_1                  | H bE_bT3_y6_1 / HbA_bT3_y9_1                   | 0,19          |
| HbE/HbA_2                  | HbE_bT3_y7_1 / HbA_bT3_y8_1                    | 0,19          |
| HbD <sup>punj</sup> /HbA_1 | HbD <sup>punj</sup> _bT13_b2_1 / HbA_bT13_b2_1 | 1,0           |
| HbD <sup>punj</sup> /HbA_2 | HbD <sup>punj</sup> _bT13_b3_1 / HbA_bT13_b3_1 | 1,0           |
| HbO <sup>arab</sup> /HbA_1 | HbO <sup>arab</sup> _bT13_y9_1 / HbA_bT13_y9_1 | 0,6           |
| HbLep/HbA_1                | HbLep dT2 y6 / HbA bT2 y6                      |               |
| HbLep/HbA_2                | HbLep dT2 y3 / HbA bT2 y6                      |               |
| HbF/HbA_1                  | HbF_gT2_y06 / HbA_bT2_y06_1                    |               |
| HbF/HbA_2                  | HbF_gT5_y04 / HbA_bT3_y8_1                     |               |
| HbA/HbF_1                  | HbA_bT1_y7_2 / HbF_gT2_y06                     |               |
| HbA/HbF_2                  | HbA_bT3_y8_1 / HbF_gT2_y06                     |               |
