# Supplementary material for: A high-throughput newborn screening approach for SCID, SMA, and SCD combining multiplex qPCR and tandem mass spectrometry
Source: PubMed Central journal article supplement (PMC10004496; doi:10.1371/journal.pone.0283024), 2023-03-10
Supplement: pone.0283024.s007.pdf [file pone.0283024.s007.pdf]

**S4 Table. Diagnostic ratios obtained with the MS/MS assay for the four HbC-containing specimens corresponding to the amplification plots depicted in S3 Figure.**

| Ratio                      | Cutoff | Results              |                      |                      |                   |
|----------------------------|--------|----------------------|----------------------|----------------------|-------------------|
|                            |        | HbC/A<br>specimen #1 | HbC/A<br>specimen #2 | HbC/A<br>specimen #3 | HbC/C<br>specimen |
| HbS/HbA_1                  | 2,67   | 0.0006               | 0.0011               | 0.0004               | 2.0043            |
| HbS/HbA_2                  | 3,17   | 0.0005               | 0.0007               | 0.0067               | 0.0061            |
| <b>HbC/HbA_1</b>           | 1,0    | <b>1.7474</b>        | <b>2.0168</b>        | <b>2.1743</b>        | <b>2297.0952</b>  |
| <b>HbC/HbA_2</b>           | 1,0    | <b>10.2245</b>       | <b>11.5384</b>       | <b>10.751</b>        | <b>104.5898</b>   |
| HbE/HbA_1                  | 0,19   | 0.0037               | 0.0092               | 0.0003               | 0.0001            |
| HbE/HbA_2                  | 0,19   | 0.0931               | 0.0417               | 0.0032               | 0.4258            |
| HbD <sup>punj</sup> /HbA_1 | 1,0    | 0.0005               | 0.0007               | 0.0005               | 0.0052            |
| HbD <sup>punj</sup> /HbA_2 | 1,0    | 0.0002               | 0.001                | 0.0002               | 0.0006            |
| HbO <sup>arab</sup> /HbA_1 | 0,6    | 0.0203               | 0.0096               | 0.0243               | 0.0005            |
| HbF/HbA_1                  |        | 0.9399               | 0.9445               | 0.3758               | 2.1963            |
| HbF/HbA_2                  |        | 0.6409               | 0.4629               | 0.2087               | 1.0238            |
| HbA/HbF_1                  |        | 0.3014               | 0.2799               | 0.6443               | 0.017             |
| HbA/HbF_2                  |        | 0.4                  | 0.4813               | 0.9356               | 0.1587            |
